# Supplementary material for: Modification of Battery Separators via Electrospinning to Enable Lamination in Cell Assembly
Source: MDPI journal article supplement (doi:10.3390/en15228430), 2022-11-11
Supplement: s1 [file s1]

# Supplementary Materials: Modification of Battery Separators via Electrospinning to enable Lamination in Cell Assembly

Jakob Veitl<sup>\*,†</sup>, Hans-Konrad Weber<sup>†</sup>, Martin Frankenberger and Karl-Heinz Pettinger

Technology Center for Energy, University of Applied Sciences Landshut, Wiesenweg 1, 94099 Ruhstorf, Germany

\* Correspondence: Jakob.Veitl@haw-landshut.de; Tel.: +49-8531-914044-17

† These authors contributed equally to this work.

## 1 EIS spectra

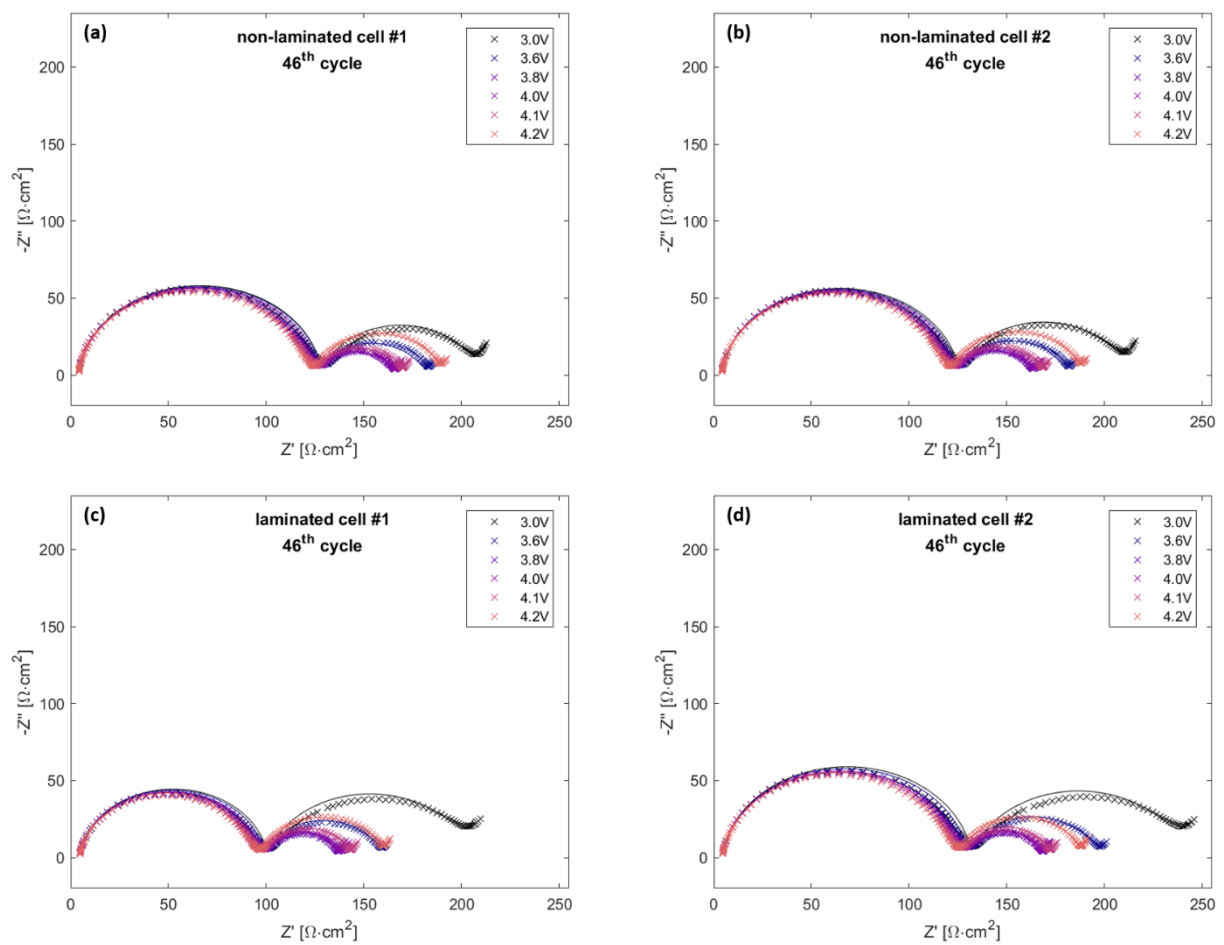

Figure s1: Nyquist plots for potentiostatic electrochemical impedance spectroscopy (EIS) measurements (100 kHz – 10 mHz, amplitude 10 mV<sub>peak</sub>) of NMC 622 – graphite single cells with coated ceramic separator, comparing non-laminated and electrospun/laminated state; fitting curves indicated as solid lines.

## 2 EIS analysis

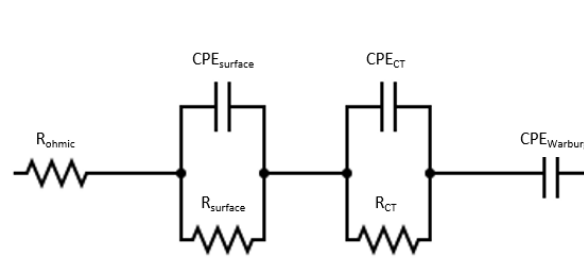

Figure s2: Equivalent circuit model used for equivalent circuit fit analysis of EIS measurements, collected for NMC 622 – graphite single cells with coated ceramic separator, comparing non-laminated and electrospun/laminated state.

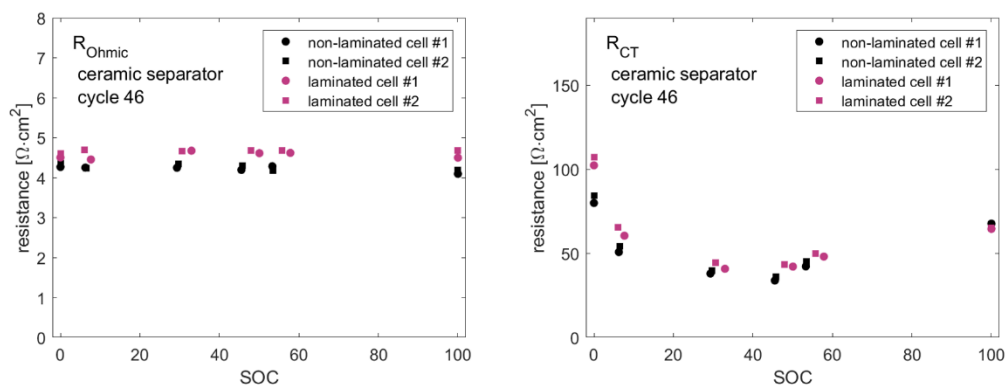

Figure s3: Additional resistance fit parameters of equivalent circuit fit analysis of EIS measurements, collected for NMC 622 – graphite single cells with coated ceramic separator, comparing non-laminated and electrospun/laminated state.

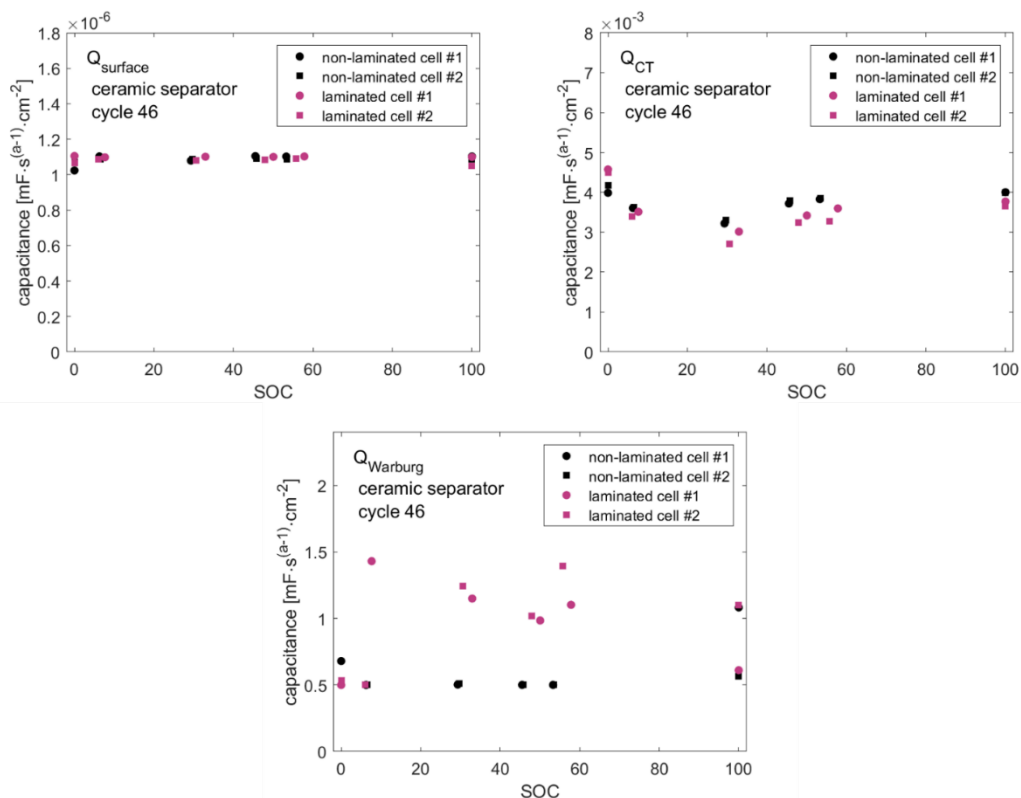

Figure s4: Capacitance fit parameters of equivalent circuit fit analysis of EIS measurements, collected for NMC 622 – graphite single cells with coated ceramic separator, comparing non-laminated and electrospun/laminated state.

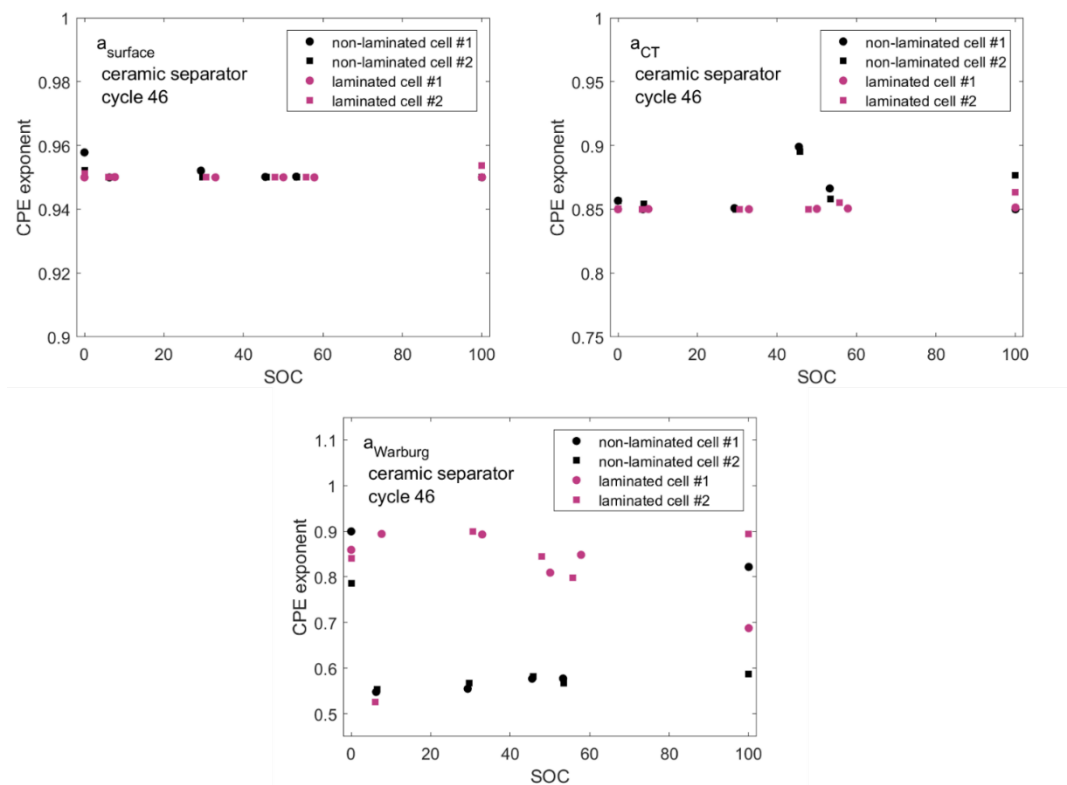

Figure s5: CPE exponent fit parameters of equivalent circuit fit analysis of EIS measurements, collected for NMC 622 – graphite single cells with coated ceramic separator, comparing non-laminated and electrospun/laminated state.
